# Supplementary material for: Pseudo-polymorphism in the toluene solvate of p-tert-butylcalix[5]arene: structural and gas sorption investigation
Source: Royal Society of Chemistry journal article supplement (doi:10.1039/b809457h), 2008-01-01
Supplement: b809457h.pdf [file b809457h.pdf]

Supplementary information for manuscript:

**Pseudo-polymorphism in the toluene solvate of *p*-tert-butylcalix[5]arene: Structural and gas sorption investigations**

As it was pointed out that the OH positions in reference [4] of the manuscript are incorrect, this has been resolved and is submitted as supporting information for the current manuscript.

**Crystal data for TBC5·Tol I (original CSD entry DEVSAZ):** C<sub>138</sub>H<sub>172</sub>O<sub>10</sub>, *M* = 1990.76, triclinic, *a* = 17.127(3), *b* = 18.127(3), *c* = 22.045(3) Å, *α* = 87.057(3), *β* = 67.666(3), *γ* = 70.904(3)°, *U* = 5961.6(16) Å<sup>3</sup>, *μ* = 1.109 mm<sup>-1</sup>, *T* = 173(2) K, space group *P*1, *Z* = 2, Mo-Kα radiation (wavelength *λ* = 0.71073 Å), final goodness of fit = 1.048, agreement index *R*<sub>1</sub> = 0.0788, 42944 reflections measured, 25654 unique (*R*<sub>int</sub> = 0.0236) which were used in all calculations. The final weighted agreement index *ωR*(*F*<sup>2</sup>) was 0.2498 (all data).

**Crystal data for Sublimed TBC5 (original CSD entry DEVSED):** C<sub>27.50</sub>H<sub>35</sub>O<sub>2.5</sub>, *M* = 405.55, orthorhombic, *a* = 12.780(3), *b* = 15.035(6), *c* = 15.340(4) Å, *U* = 4908(2) Å<sup>3</sup>, *μ* = 1.098 mm<sup>-1</sup>, *T* = 173(2) K, space group *Pnma*, *Z* = 8, Mo-Kα radiation (wavelength *λ* = 0.71073 Å), final goodness of fit = 1.058, *R*<sub>1</sub> = 0.0911, 12069 reflections measured, 3610 unique (*R*<sub>int</sub> = 0.1290) which were used in all calculations. The final *ωR*(*F*<sup>2</sup>) was 0.1992 (all data).
